# Supplementary material
Source: PubMed Central journal article supplement (PMC6439437)
Supplement: nn8b09410_si_001.pdf [file nn8b09410_si_001.pdf]

## Supporting information

### Weak Multivalent Binding of Influenza Hemagglutinin Nanoparticles at a Sialoglycan-Functionalized Supported Lipid Bilayer

Daniele Di Iorio<sup>+,a</sup>, Mark L. Verheijden<sup>+,a</sup>, Erhard van der Vries<sup>\*,b</sup>, Pascal Jonkheijm<sup>a</sup>, Jurriaan Huskens<sup>\*,a</sup>

<sup>a</sup> *Molecular Nanofabrication Group, MESA+ Institute for Nanotechnology, Department of Science and Technology, University of Twente, P.O. Box 217, 7500 AE, Enschede, The Netherlands;*

<sup>b</sup> *Virology Division, Department of Infectious Diseases and Immunology, Faculty of Veterinary Medicine, Utrecht University, 3584 CL Utrecht, The Netherlands.*

<sup>+</sup> *These authors contributed equally.*

<sup>\*</sup> *Correspondence to: [e.vandervries@uu.nl](mailto:e.vandervries@uu.nl), [j.huskens@utwente.nl](mailto:j.huskens@utwente.nl)*

Supporting figures

(A)

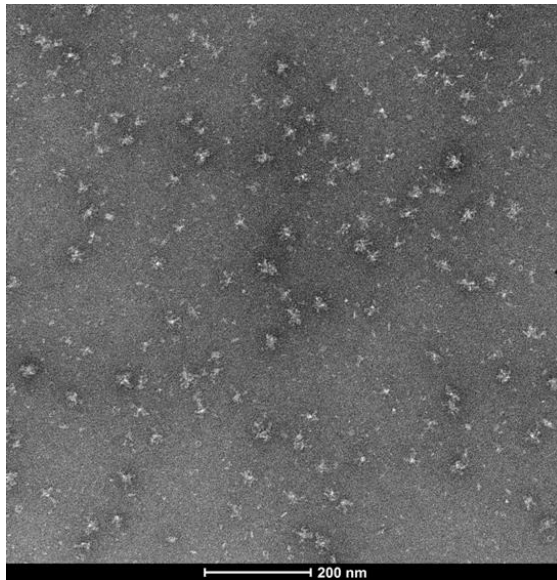

(B)

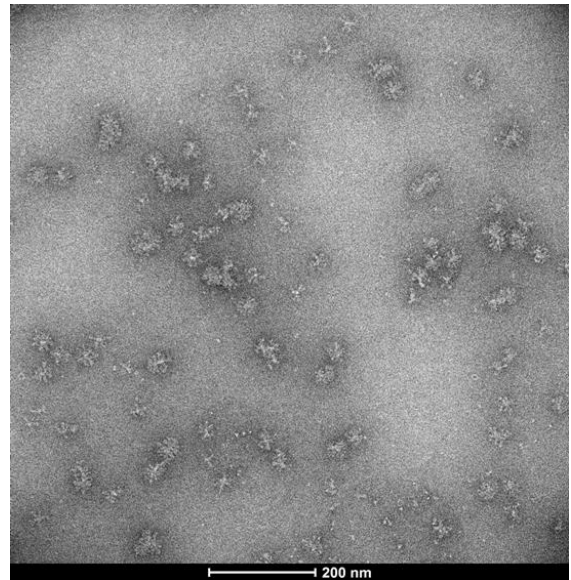

**Figure S1. Electron micrograph of HA trimer rosettes from Influenza virus embedded in Phospho-Tungstic-Acid (PTA, 1% (w/v), pH 7.4).** A) rHA rosettes from A/New Caledonia/20/99. B) rHA rosettes from A/Brisbane/59/07

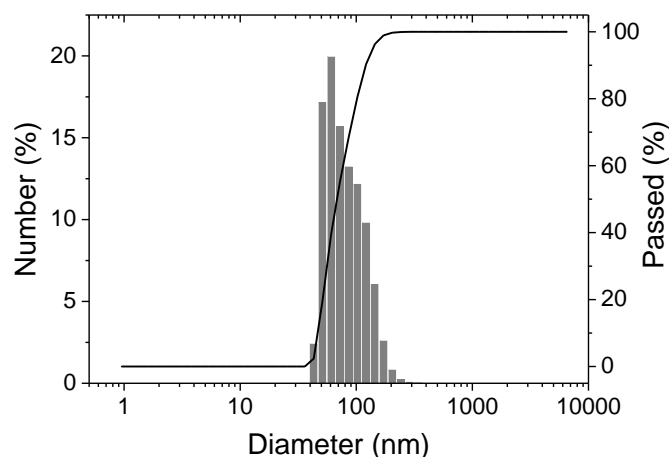

**Figure S2: Dynamic light scattering (DLS) data of DOPC vesicles containing 5 mol% DOPE-biotin, extruded 11x through a membrane with a 100 nm pore size.**

**A)**

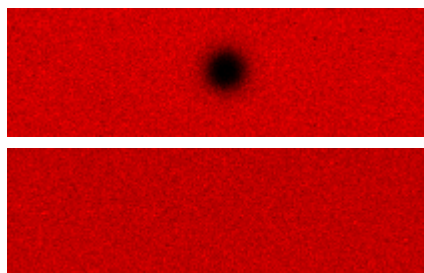

**B)**

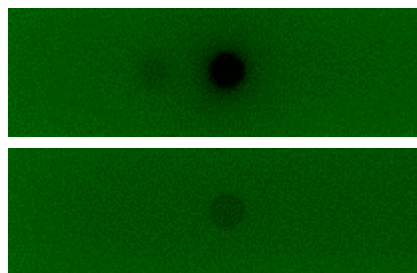

**C)**

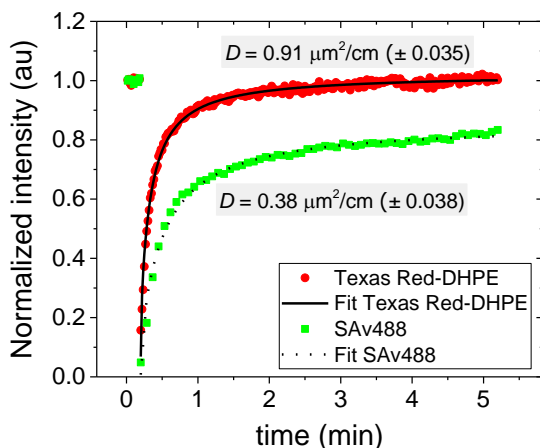

**Figure S3. Fluorescence recovery after photobleaching (FRAP) by confocal microscopy of DOPC SLB with 0.2 mol% TR-DHPE and 1 mol% DOPE-biotin after 1 h incubation of 0.2  $\mu\text{M}$  SAv488 and subsequent rinsing with HEPES buffer. A) red channel from TR-DHPE after photobleaching (top) and after 5 min recovery (bottom). B) green channel from SAv488 after photobleaching (top) and after 5 min recovery (bottom). C) Fluorescence intensity recovery profiles vs time of the Texas Red-DHPE and SAv488 after photobleaching.**

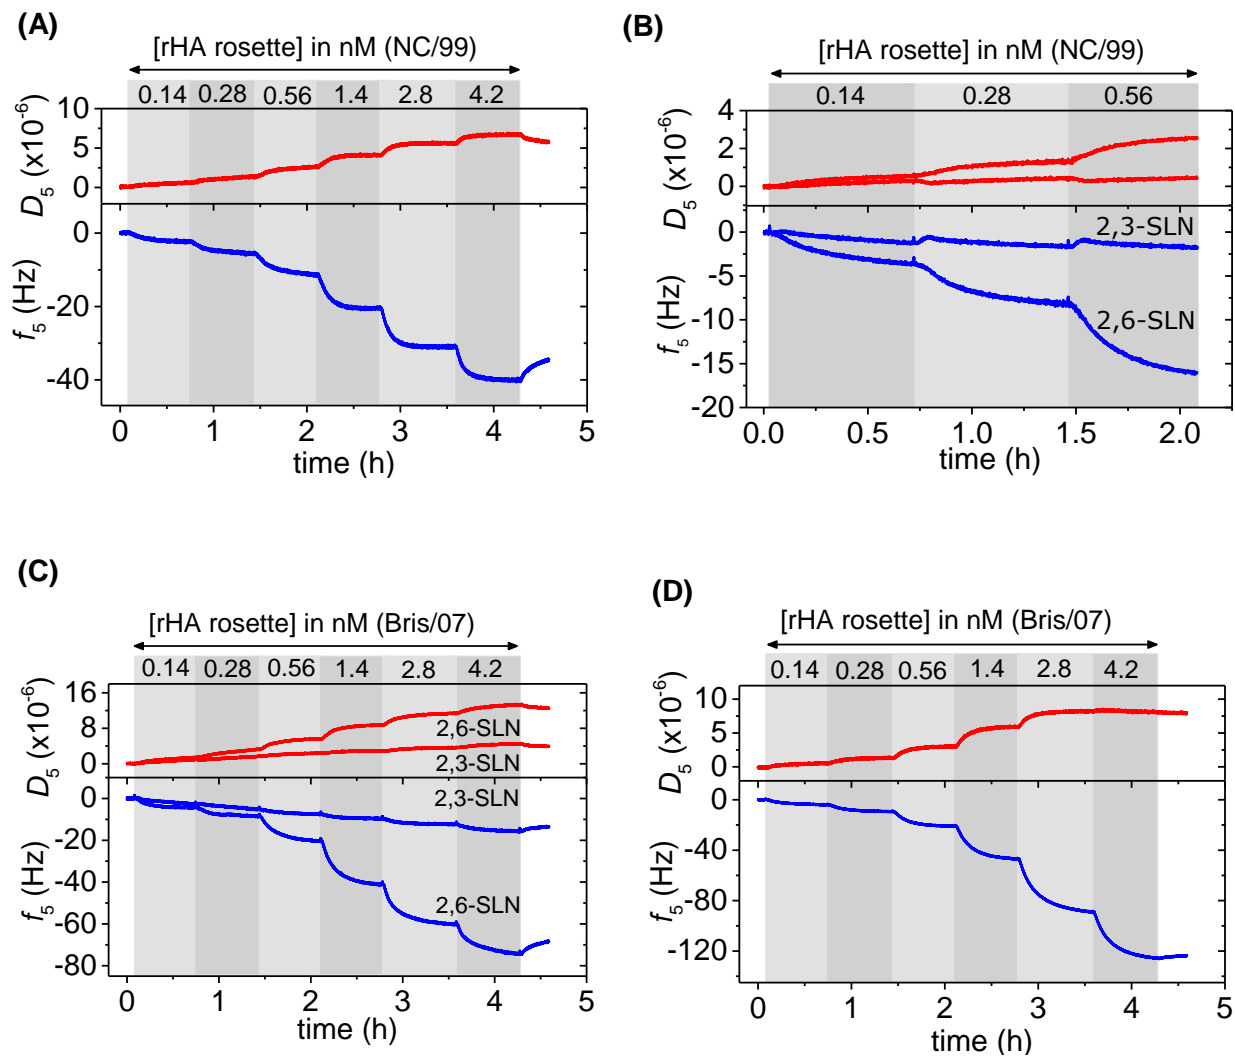

**Figure S4: QCM-D binding profiles for titrations of rHA clusters onto SLB platforms:** (A) NC/99 rHA rosettes at a 2,6-SLN surface with 0.4 mol% DOPE-biotin, (B) NC/99 HA rosettes at 2,3-SLN and 2,6-SLN surfaces with 0.4 mol% DOPE-biotin, (C) Bris/07 rHA rosettes at 2,3-SLN and 2,6-SLN surfaces with 0.4 mol% DOPE-biotin, and (D) Bris/07 HA cluster at a 2,6-SLN surface with 5 mol% DOPE-biotin. Grey areas indicate the binding steps and white areas indicate washing with HEPES saline buffer at pH 7.4. All steps were performed under flow.

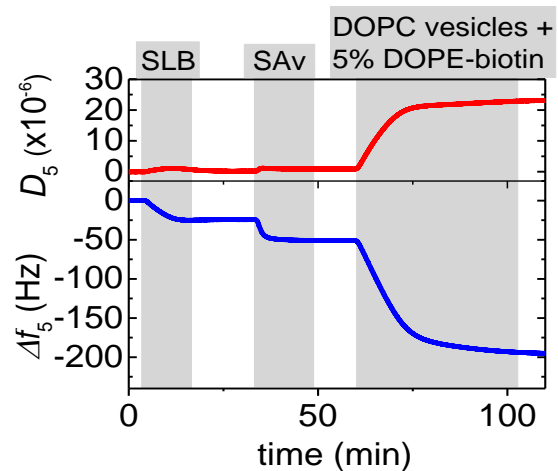

**Figure S5: QCM-D binding profile of biotinylated lipid bilayer vesicles of 100 nm in diameter at SAV-modified SLB.** The formation of DOPC SLB containing 2 mol% of DOPE-biotin was followed by absorption of SAV (1  $\mu$ M) and subsequently by DOPC vesicles doped with 5 mol% of DOPE-biotin. Grey areas indicate the binding steps and white areas indicate buffer wash steps. All steps were performed under flow.

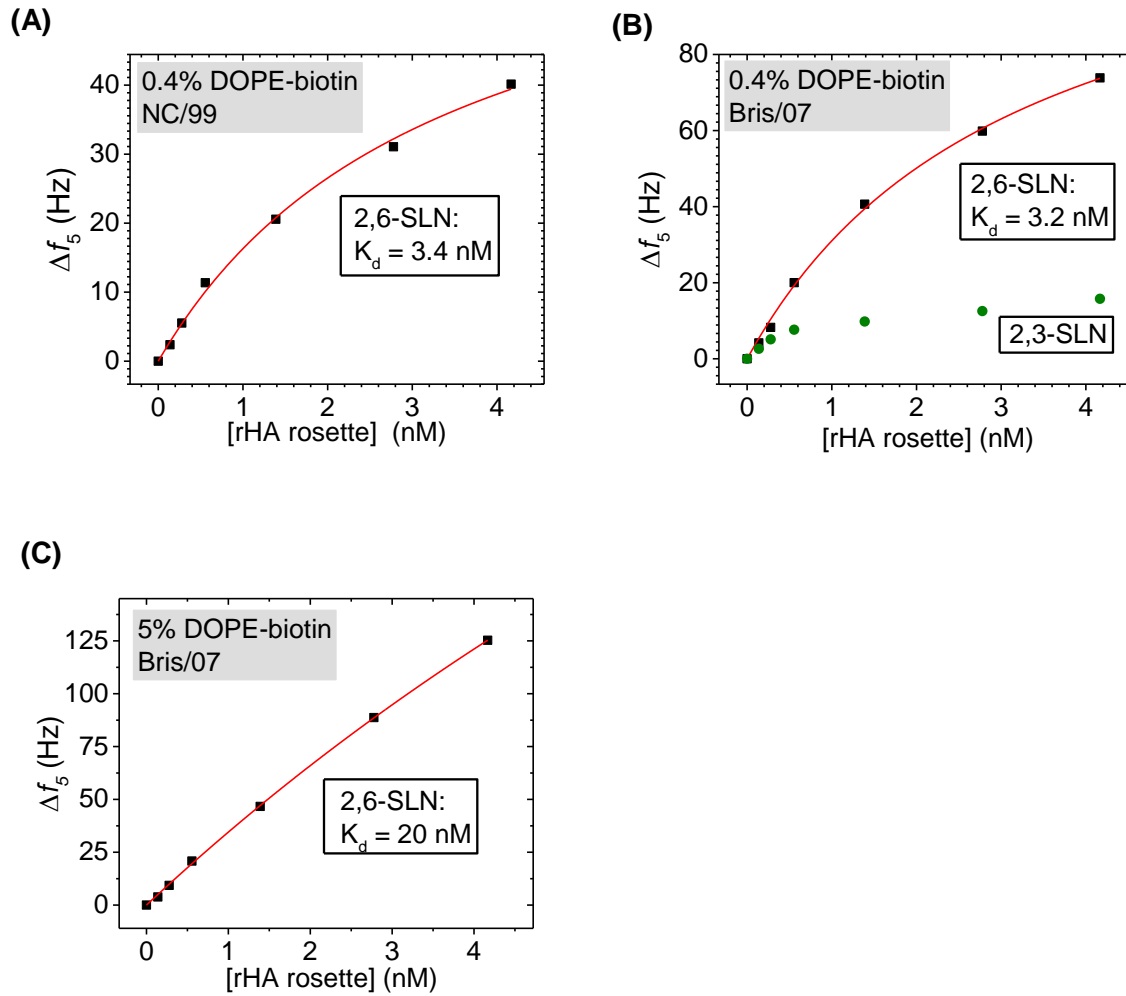

**Figure S6: Langmuir binding model fitted to the binding data** for: A) NC/99 at 0.4% DOPE-biotin in SLB with 2,6 SLN (see Figure S4A), B) Bris/07 at 0.4% DOPE-biotin in SLB with 2,6 SLN (see Figure S4C) and C) Bris/07 at 5% DOPE-biotin in SLB with 2,6 SLN (see Figure S4D). Dissociation constants  $K_d$  are given and plateau values were co-fitted with  $K_d$ . Plateau values obtained from the fits are 71, 130 and 739 for A, B and C, respectively.

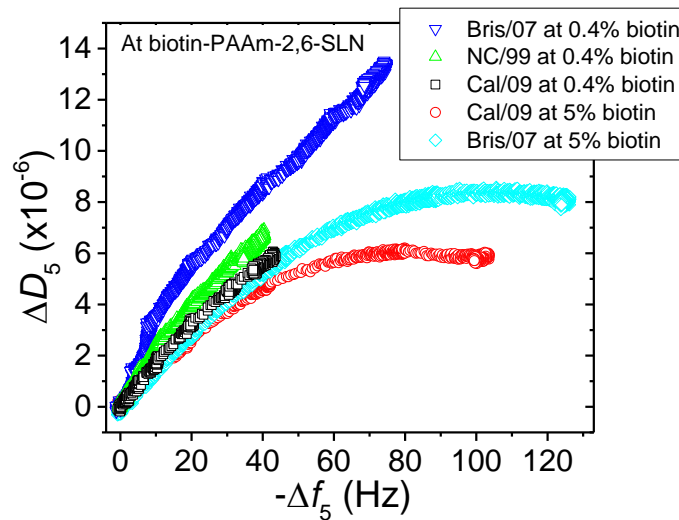

**Figure S7.**  $\Delta D_5$  as function of  $-\Delta f_5$  for the rHA cluster titration step for the three tested clusters at surfaces with 0.4% or 5% DOPE-biotin, and with the 2,6-SLN receptor.

### Calculation of the quantification of receptors on a surface

Considering that one DOPC lipid covers  $0.725 \text{ nm}^2$  and, therefore, the lipid density in SLB is  $1.38 \text{ molecule per nm}^2$  ( $= 2.3 \times 10^{-10} \text{ mol/cm}^2 = a$ ), we obtain as follows:

- fraction DOPE-biotin =  $x$ ;
  - $\Theta(\text{bt, SLB}) = x \times a = xa$ ;
  - $\Theta(\text{SAv}) = \frac{1}{2}xa$ ;
  - $\Theta(\text{bt, PAA}) = xa$ ;
  - $\Theta(\text{SLN, PAA}) = 4xa$  (= ratio SLN/biotin in PAA).
- Therefore at  $x = 0.1\%$ :  $\Theta(\text{SLN}) = 0.92 \text{ pmol/cm}^2$ , etc.
